# Supplementary material for: Citizen science project reveals novel fusarioid fungi (Nectriaceae, Sordariomycetes) from urban soils
Source: PubMed Central journal article supplement — Fungal Syst Evol. 2021 Oct 12;8:101–27. doi: 10.3114/fuse.2021.08.09 (PMC8687230; doi:10.3114/fuse.2021.08.09), 2021-10-12
Supplement: fuse-2021-8-9-SD1.pdf [file fuse-2021-8-9-SD1.pdf]

Table S1

Table S1. Collection details and GenBank accession numbers of strains used in the phylogenetic trees.

| Species                         | Specie's complex    | Culture accession number used in phylogenetic trees <sup>1</sup> | Status of culture | Accession number in other culture or working collections <sup>1</sup> |                                         | Country of origin | Substrate of origin | cnda              | rpb1              | GenBank accession number(s) <sup>2,3</sup> |                   | taz1 | taz2 |
|---------------------------------|---------------------|------------------------------------------------------------------|-------------------|-----------------------------------------------------------------------|-----------------------------------------|-------------------|---------------------|-------------------|-------------------|--------------------------------------------|-------------------|------|------|
|                                 |                     |                                                                  |                   | collections <sup>1</sup>                                              | working                                 |                   |                     |                   |                   | rpb1 (part 1)                              | rpb2 (part 2)     |      |      |
| <i>Fusarium acacie-mearnsii</i> | sambudium           | NRRL 26752                                                       | ex-type           | CBS 110253                                                            | Soil                                    | Australia         | JAGDVM010000002.1   | JAGDVM010000003.1 | JAGDVM010000008.1 | JAGDVM010000008.1                          | AF212447          | -    |      |
| <i>Fusarium acacie-mearnsii</i> | sambudium           | NRRL 26754                                                       | ex-type           | CBS 110254 = MRC 5120 = NRRL 25754                                    | <i>Acacia mearnsii</i>                  | South Africa      | JAUVU010000001.0    | JAUVU010000010.0  | JAUVU010000080.0  | JAUVU010000080.0                           | AF212448          | -    |      |
| <i>Fusarium acacie-mearnsii</i> | sambudium           | NRRL 26755                                                       | ex-type           | CPC 37959 = UB0CC-A-109005                                            | Soil                                    | Australia         | MW233257            | MW233429          | MW233429          | MW233429                                   | AF212449          | -    |      |
| <i>Fusarium acacie-mearnsii</i> | sambudium           | NRRL 54213                                                       | ex-type           | -                                                                     | <i>Triticum aestivum</i>                | France            | MZ078177            | -                 | -                 | -                                          | MZ078246          | -    |      |
| <i>Fusarium acacie-mearnsii</i> | sambudium           | NRRL 54216                                                       | ex-type           | -                                                                     | -                                       | -                 | -                   | -                 | -                 | -                                          | HM068311          | -    |      |
| <i>Fusarium acacie-mearnsii</i> | sambudium           | NRRL 54217                                                       | ex-type           | -                                                                     | -                                       | -                 | -                   | -                 | -                 | -                                          | HM068314          | -    |      |
| <i>Fusarium acacie-mearnsii</i> | sambudium           | NRRL 54218                                                       | ex-type           | -                                                                     | -                                       | -                 | -                   | -                 | -                 | -                                          | HM068315          | -    |      |
| <i>Fusarium acacie-mearnsii</i> | sambudium           | CBS 122858                                                       | ex-type           | NRRL 46726                                                            | Wheat seed                              | Ethiopia          | MW233298            | MW233470          | MW233470          | MW233470                                   | F240298           | -    |      |
| <i>Fusarium acacie-mearnsii</i> | sambudium           | MRC 6122                                                         | ex-type           | NRRL 31727                                                            | <i>Sorghum bicolor</i> soil debris      | South Africa      | L7996176            | L7996189          | -                 | -                                          | L7996092          | -    |      |
| <i>Fusarium acacie-mearnsii</i> | incarnatum-equiseti | GMCC 3.19493                                                     | ex-type           | NRRL 26911                                                            | <i>Brassica campestris</i> , pollen     | China             | MK289739            | MK289739          | MK289739          | MK289739                                   | MK289584          | -    |      |
| <i>Fusarium acacie-mearnsii</i> | incarnatum-equiseti | LCL1639                                                          | ex-type           | ATCC 24373 = IMI 160243 = NRRL 26855 =                                | <i>Oryza sp.</i>                        | China             | MK289798            | MK289798          | MK289798          | MK289798                                   | MK289586          | -    |      |
| <i>Fusarium acacie-mearnsii</i> | incarnatum-equiseti | NRRL 32997                                                       | ex-type           | NRRL 26916                                                            | Human toenail                           | USA               | GM050536            | GM050536          | GM050536          | GM050536                                   | GM0505624         | -    |      |
| <i>Fusarium acacie-mearnsii</i> | sambudium           | NRRL 13818                                                       | ex-type           | CBS 110257 = FRC R-5469                                               | <i>Hordeum vulgare</i>                  | Japan             | JK171573            | JK171573          | JK171573          | JK171573                                   | AF212451          | -    |      |
| <i>Fusarium acacie-mearnsii</i> | sambudium           | NRRL 28570                                                       | ex-type           | BBA 65928 = FRC R-9402                                                | <i>Zea mays</i>                         | Nepal             | LHTZ010000010.1     | LHTZ010000031.1   | LHTZ010000031.1   | LHTZ010000031.1                            | AF212453          | -    |      |
| <i>Fusarium acacie-mearnsii</i> | sambudium           | NRRL 28585                                                       | ex-type           | CBS 110244                                                            | Herbaceous vine                         | Brazil            | KM361661            | KM361661          | KM361661          | KM361661                                   | AF212439          | -    |      |
| <i>Fusarium acacie-mearnsii</i> | sambudium           | NRRL 2903                                                        | ex-type           | FRC R-8510 = IMI 309354 = NRRL 26850 =                                | Polyure                                 | Brazil            | JAAMOD010000000.0   | JAAMOD010000020.0 | JAAMOD010000020.0 | JAAMOD010000020.0                          | JAAMOD010000079.0 | -    |      |
| <i>Fusarium acacie-mearnsii</i> | sambudium           | CBS 408.86                                                       | ex-neotype        | NRRL 26911                                                            | <i>Hordeum vulgare</i>                  | Denmark           | MG282372            | MG282401          | MG282401          | MG282401                                   | MW928836          | -    |      |
| <i>Fusarium acacie-mearnsii</i> | trichinum           | NRRL 54939                                                       | ex-type           | F05001                                                                | <i>Hordeum vulgare</i>                  | Finland           | JK171551            | JK171551          | JK171551          | JK171551                                   | MH458291          | -    |      |
| <i>Fusarium acacie-mearnsii</i> | sambudium           | CBS 31673                                                        | ex-type           | ATCC 24373 = IMI 160243 = NRRL 26855 =                                | <i>Zea mays</i>                         | South Africa      | KM361641            | KM361641          | KM361641          | KM361641                                   | GM915503          | -    |      |
| <i>Fusarium acacie-mearnsii</i> | fujikuroi           | NRRL 20954                                                       | ex-type           | BBA 64691                                                             | <i>Sorghum vulgare</i>                  | India             | MH845430            | MH845430          | MH845430          | MH845430                                   | MW230075          | -    |      |
| <i>Fusarium acacie-mearnsii</i> | fujikuroi           | NRRL 25093                                                       | ex-type           | -                                                                     | <i>Tectaria grandis</i>                 | India             | IF740956            | IF740956          | IF740956          | IF740956                                   | IF740722          | -    |      |
| <i>Fusarium acacie-mearnsii</i> | sambudium           | NRRL 31238                                                       | ex-type           | -                                                                     | Barley                                  | Brazil            | KM361663            | KM361663          | KM361663          | KM361663                                   | -                 | -    |      |
| <i>Fusarium acacie-mearnsii</i> | sambudium           | NRRL 31281                                                       | ex-type           | CBS 119180                                                            | <i>Avena sativa</i>                     | Madagascar        | JABCJS010000032     | JABCJS010000032   | JABCJS010000032   | JABCJS010000032                            | AM452964          | -    |      |
| <i>Fusarium acacie-mearnsii</i> | sambudium           | BBA69197                                                         | ex-type           | CBS 404.97 = DAOM 225122 = IMI 375329 =                               | <i>Striga asatica</i>                   | Madagascar        | MTD10895            | MTD10948          | MTD10979          | MTD10979                                   | MTD10979          | -    |      |
| <i>Fusarium acacie-mearnsii</i> | fujikuroi           | CBS 100196                                                       | ex-type           | NRRL 25446                                                            | <i>Striga asiatica</i>                  | Madagascar        | MN193915            | MN193915          | MN193915          | MN193915                                   | MN193859          | -    |      |
| <i>Fusarium acacie-mearnsii</i> | incarnatum-equiseti | NRRL 43638                                                       | ex-type           | UTH-SC R-3500                                                         | <i>Trichostema sp. (manate)</i>         | USA               | GC050576            | GC050576          | GC050576          | GC050576                                   | GC0505665         | -    |      |
| <i>Fusarium acacie-mearnsii</i> | incarnatum-equiseti | NRRL 43694                                                       | ex-type           | -                                                                     | Human eye                               | USA               | GC050579            | GC050579          | GC050579          | GC050579                                   | GC0505668         | -    |      |
| <i>Fusarium acacie-mearnsii</i> | oxysporum           | CBS 115423                                                       | ex-type           | -                                                                     | <i>Agathosoma betulinus</i>             | South Africa      | MH484905            | MH484905          | MH484905          | MH484905                                   | MH484996          | -    |      |
| <i>Fusarium acacie-mearnsii</i> | oxysporum           | CBS 187.53                                                       | ex-type           | -                                                                     | <i>Callistephus chinensis</i>           | Netherlands       | MH484693            | MH484693          | MH484693          | MH484693                                   | MH485057          | -    |      |
| <i>Fusarium acacie-mearnsii</i> | oxysporum           | CBS 144739                                                       | ex-type           | CPC 25800                                                             | <i>Zea mays</i>                         | South Africa      | MH484937            | MH484937          | MH484937          | MH484937                                   | MH485119          | -    |      |
| <i>Fusarium acacie-mearnsii</i> | oxysporum           | CBS 144739                                                       | ex-type           | CPC 25792                                                             | <i>Zea mays</i>                         | South Africa      | MH484755            | MH484755          | MH484755          | MH484755                                   | MH485028          | -    |      |
| <i>Fusarium acacie-mearnsii</i> | oxysporum           | CBS 144740                                                       | ex-type           | CPC 25795                                                             | <i>Zea mays</i>                         | South Africa      | MH484935            | MH484935          | MH484935          | MH484935                                   | MH485116          | -    |      |
| <i>Fusarium acacie-mearnsii</i> | oxysporum           | CBS 144741                                                       | ex-type           | CPC 25795                                                             | <i>Zea mays</i>                         | South Africa      | MH484936            | MH484936          | MH484936          | MH484936                                   | MH485117          | -    |      |
| <i>Fusarium acacie-mearnsii</i> | incarnatum-equiseti | CBS 150.25                                                       | ex-type           | ATCC 11883                                                            | <i>Cestis australis</i>                 | Italy             | MN170317            | MN170317          | MN170317          | MN170317                                   | MN170451          | -    |      |
| <i>Fusarium acacie-mearnsii</i> | citricola           | MLUCC 16-0526                                                    | ex-type           | KUMCC 16-0019                                                         | Pasture soil                            | Italy             | MH576577            | MH576577          | MH576577          | MH576577                                   | MH576577          | -    |      |
| <i>Fusarium acacie-mearnsii</i> | sambudium           | CBS 119873                                                       | ex-type           | FRC R-4758 = MRC 2878                                                 | <i>Citrus reticulata</i> , crown canker | USA               | MZ921800            | MZ921800          | MZ921800          | MZ921800                                   | MZ921929          | -    |      |
| <i>Fusarium acacie-mearnsii</i> | citricola           | CBS 142421                                                       | ex-type           | CPC 27805                                                             | <i>Citrus limon</i> , twigs canker      | Italy             | L746290             | L746290           | L746310           | L746310                                    | L746197           | -    |      |
| <i>Fusarium acacie-mearnsii</i> | citricola           | CPC 27067                                                        | ex-type           | -                                                                     | -                                       | Italy             | L746287             | L746287           | L746307           | L746307                                    | L746194           | -    |      |
| <i>Fusarium acacie-mearnsii</i> | incarnatum-equiseti | CBS 119881                                                       | ex-type           | MRC 8412 = KSU 11437 = Univ. Sydney 6510                              | Desert soil                             | Namibia           | MN170323            | MN170323          | MN170323          | MN170323                                   | MN170457          | -    |      |
| <i>Fusarium acacie-mearnsii</i> | incarnatum-equiseti | CBS 126202                                                       | ex-type           | BBA 64265 = NRRL 25795                                                | <i>Disphyma crassifolium</i>            | Germany           | MN170389            | MN170389          | MN170389          | MN170389                                   | MN170456          | -    |      |
| <i>Fusarium acacie-mearnsii</i> | incarnatum-equiseti | CBS 394.93                                                       | ex-type           | -                                                                     | <i>Human sinus cavity</i>               | USA               | GC050577            | GC050577          | GC050577          | GC050577                                   | GC0505597         | -    |      |
| <i>Fusarium acacie-mearnsii</i> | fujikuroi           | NRRL 43623                                                       | ex-type           | FRL 19329 = RBC 5368                                                  | <i>Coix coarctata</i>                   | Australia         | GC0505839           | GC0505839         | GC0505839         | GC0505839                                  | GC0505661         | -    |      |
| <i>Fusarium acacie-mearnsii</i> | incarnatum-equiseti | CBS 185.31                                                       | ex-epitype        | NRRL 36318                                                            | Cotton thread                           | UK                | KP083274            | KP083274          | KP083274          | KP083274                                   | KP083251          | -    |      |
| <i>Fusarium acacie-mearnsii</i> | oxysporum           | CBS 186.31                                                       | ex-epitype        | NRRL 36323                                                            | Cotton thread                           | UK                | GC050558            | GC050558          | GC050558          | GC050558                                   | GC0505646         | -    |      |
| <i>Fusarium acacie-mearnsii</i> | oxysporum           | CBS 111552                                                       | ex-type           | -                                                                     | Human eye                               | USA               | GC0505826           | GC0505826         | GC0505826         | GC0505826                                  | GC0505648         | -    |      |
| <i>Fusarium acacie-mearnsii</i> | oxysporum           | CBS 114889                                                       | ex-type           | -                                                                     | Pasteurised fruit juice                 | Netherlands       | GC0505780           | GC0505780         | GC0505780         | GC0505780                                  | GC0505602         | -    |      |
| <i>Fusarium acacie-mearnsii</i> | oxysporum           | CBS 117461                                                       | ex-type           | -                                                                     | Pasteurised chocolate milk              | Germany           | MH484719            | MH484719          | MH484719          | MH484719                                   | MH484991          | -    |      |
| <i>Fusarium acacie-mearnsii</i> | sambudium           | NRRL 29297                                                       | ex-type           | -                                                                     | Tetra pack with milky nutrition         | Netherlands       | MH484911            | MH484911          | MH484911          | MH484911                                   | MH484992          | -    |      |
| <i>Fusarium acacie-mearnsii</i> | incarnatum-equiseti | CBS 131777                                                       | ex-type           | CBS 119183 = ICMP 5435                                                | <i>Cardaria salfiana</i>                | New Zealand       | MH484729            | MH484729          | MH484729          | MH484729                                   | MH485002          | -    |      |
| <i>Fusarium acacie-mearnsii</i> | incarnatum-equiseti | NRRL 3020                                                        | ex-type           | FRC R-6053 = MRC 2231                                                 | <i>Triticum sp.</i>                     | Iran              | MN170329            | MN170329          | MN170329          | MN170329                                   | MN170463          | -    |      |
| <i>Fusarium acacie-mearnsii</i> | oxysporum           | CBS 130304                                                       | ex-type           | BBA 69050 = NRRL 25433                                                | <i>Gossypium barbadense</i>             | China             | GC0505498           | GC0505498         | GC0505498         | GC0505498                                  | GC0505586         | -    |      |
| <i>Fusarium acacie-mearnsii</i> | oxysporum           | CBS 620.72                                                       | ex-type           | DSM 11271 = NRRL 36520                                                | <i>Crocus sp.</i>                       | Germany           | MH484739            | MH484739          | MH484739          | MH484739                                   | MH485012          | -    |      |
| <i>Fusarium acacie-mearnsii</i> | oxysporum           | InaCC 983                                                        | ex-type           | -                                                                     | <i>Musa sp. var. Pisang Kepok</i>       | Indonesia         | MH484697            | MH484697          | MH484697          | MH484697                                   | MH485061          | -    |      |
| <i>Fusarium acacie-mearnsii</i> | oxysporum           | InaCC 984                                                        | ex-type           | -                                                                     | <i>Musa sp. var. Pisang Kepok</i>       | Indonesia         | MH484879            | MH484879          | MH484879          | MH484879                                   | MH485075          | -    |      |
| <i>Fusarium acacie-mearnsii</i> | sambudium           | CBS 417.86                                                       | ex-epitype        | FRC R-8504 = IMI 309344 = NRRL 25475                                  | Barley kernel                           | Denmark           | L5479559            | L5479559          | L5479559          | L5479559                                   | L5479757          | -    |      |
| <i>Fusarium acacie-mearnsii</i> | oxysporum           | CBS 141.95                                                       | ex-type           | NRRL 26422 = PD 94/1518                                               | <i>Hebea helix</i>                      | Netherlands       | JK171628            | JK171628          | JK171628          | JK171628                                   | KR773384          | -    |      |
| <i>Fusarium acacie-mearnsii</i> | oxysporum           | CBS 238.94                                                       | ex-type           | BBA 8398 = DSM 62308 = NRRL 22545                                     | <i>Mattiola incana</i>                  | Netherlands       | MH484894            | MH484894          | MH484894          | MH484894                                   | MH485076          | -    |      |
| <i>Fusarium acacie-mearnsii</i> | oxysporum           | CBS 247.61                                                       | ex-type           | CBS 119181 = ICMP 5269                                                | <i>Orchard grass</i>                    | Germany           | MH484876            | MH484876          | MH484876          | MH484876                                   | MH484985          | -    |      |
| <i>Fusarium acacie-mearnsii</i> | sambudium           | NRRL 29298                                                       | ex-type           | CBS 123656 = FRC R-7593                                               | <i>Dactylis glomerata</i>               | New Zealand       | KM361654            | KM361654          | KM361654          | KM361654                                   | DC459748          | -    |      |
| <i>Fusarium acacie-mearnsii</i> | sambudium           | NRRL 29380                                                       | ex-type           | BBA 11129                                                             | Branch of <i>Pinus domestica</i>        | USA               | KM361653            | KM361653          | KM361653          | KM361653                                   | AM452959          | -    |      |
| <i>Fusarium acacie-mearnsii</i> | trichinum           | CBS 795.70                                                       | ex-type           | -                                                                     | Infested with <i>Dia.spilolius</i> sp.  | Iran              | MZ921621            | MZ921621          | MZ921621          | MZ921621                                   | MZ921930          | -    |      |
| <i>Fusarium acacie-mearnsii</i> | incarnatum-equiseti | CBS 264.50                                                       | ex-type           | NRRL 36401                                                            | <i>Gossypium hirsutum</i>               | Mozambique        | GC0505563           | GC0505563         | GC0505563         | GC0505563                                  | GC0505651         | -    |      |
| <i>Fusarium acacie-mearnsii</i> | oxysporum           | CBS 120226                                                       | ex-type           | NRRL 36115                                                            | <i>Phaeosporium vulgare</i> , seed      | Sudan             | GC0505764           | GC0505764         | GC0505764         | GC0505764                                  | GC0505654         | -    |      |
| <i>Fusarium acacie-mearnsii</i> | oxysporum           | InaCC 828                                                        | ex-type           | -                                                                     | <i>Musa sapientum</i> cv Pisang ambon   | Malaysia          | MH484714            | MH484714          | MH484714          | MH484714                                   | MH484987          | -    |      |
| <i>Fusarium acacie-mearnsii</i> | oxysporum           | InaCC 831                                                        | ex-type           | -                                                                     | <i>Musa sp. var. Pisang Rastali</i>     | Indonesia         | L5479520            | L5479520          | L5479520          | L5479520                                   | L5479715          | -    |      |
| <i>Fusarium acacie-mearnsii</i> | oxysporum           | InaCC 831                                                        | ex-type           | -                                                                     | <i>Musa sp. var. Pisang Rastali</i>     | Indonesia         | L5479538            | L5479538          | L5479538          | L5479538                                   | L5479734          | -    |      |
| <i>Fusarium acacie-mearnsii</i> | oxysporum           | InaCC 8916                                                       | ex-type           | -                                                                     | <i>Musa sp. var. Pisang Kepok</i>       | Indonesia         | L5479495            | L5479495          | L5479495          | L5479495                                   | L5479688          | -    |      |

**Table S1 (Continued)**

**Table S1.** Collection details and GenBank accession numbers of strains used in the phylogenetic trees.

| Species                       | Species complex     | Culture used in phylogenetic trees <sup>1</sup> | Status of culture | Accession number in other culture or working collections <sup>1</sup>                              | Country of origin | Substrate                                     | GenBank accession number(s) <sup>1,2</sup> |
|-------------------------------|---------------------|-------------------------------------------------|-------------------|----------------------------------------------------------------------------------------------------|-------------------|-----------------------------------------------|--------------------------------------------|--------------------------------------------|--------------------------------------------|--------------------------------------------|--------------------------------------------|
|                               |                     | number used in phylogenetic trees <sup>1</sup>  |                   |                                                                                                    |                   |                                               | rp1                                        | rp2 (part 1)                               | rp2 (part 2)                               | tef1                                       | ttb2                                       |
| <i>Fusarium abidis</i>        | oxysporum           | CBS 217.49                                      | ex-type           | NRRL 36358                                                                                         | Ebées sp.         | Ebées sp.                                     |                                            | MH484870                                   |                                            | MH484961                                   | MH485052                                   |
|                               | oxysporum           | CBS 218.49                                      |                   | NRRL 36359                                                                                         | Zaire             | Zaire                                         |                                            | MH484871                                   |                                            | MH484962                                   | MH485053                                   |
|                               | oxysporum           | CBS 255.52                                      |                   | NRRL 36386                                                                                         |                   | Inoculated <i>Elaeis guineensis</i> plant     |                                            | MH484874                                   |                                            | MH484965                                   | MH485056                                   |
| <i>Fusarium avenae</i>        | incarnatum-equiseti | CBS 307.94                                      | ex-epitype        | BBA 68556 = NRRL 26419                                                                             | Germany           | Germany                                       |                                            | GQ505777                                   |                                            | GQ505777                                   |                                            |
|                               | oxysporum           | NRRL 66338                                      |                   | ITEM 11363                                                                                         | Canada            | Canada                                        |                                            | LN901574                                   |                                            | LN901574                                   | MH485120                                   |
| <i>Fusarium fovearum</i>      | oxysporum           | CBS 1447.42                                     | ex-type           | CPC 25801                                                                                          | South Africa      | South Africa                                  | MZ921691                                   | MH484938                                   |                                            | MH485029                                   | MH485121                                   |
|                               | oxysporum           | CBS 1447.43                                     |                   | CPC 25802                                                                                          | South Africa      | South Africa                                  |                                            | MH484939                                   |                                            | MH485030                                   | MH485122                                   |
|                               | oxysporum           | CBS 1447.44                                     |                   | CPC 25803                                                                                          | South Africa      | South Africa                                  |                                            | MH484940                                   |                                            | MH485031                                   |                                            |
| <i>Fusarium flagelliforme</i> | incarnatum-equiseti | CBS 162.57                                      | ex-type           | NRRL 36269                                                                                         | Croatia           | Croatia                                       |                                            | GQ505577                                   |                                            | GQ505577                                   |                                            |
|                               | incarnatum-equiseti | NRRL 3101.1                                     |                   | BBA 69079                                                                                          | Germany           | Germany                                       |                                            | GQ505784                                   |                                            | GQ505606                                   |                                            |
| <i>Fusarium flocciferum</i>   | trinetrum           | CBS 821.65                                      | ex-epitype        | NRRL 28450                                                                                         | Germany           | Germany                                       | MW928824                                   | MW928824                                   |                                            | MW928837                                   |                                            |
|                               | trinetrum           | NRRL 2947.3                                     |                   | CBS 831.85                                                                                         | Germany           | Germany                                       |                                            | JX171514                                   |                                            |                                            |                                            |
|                               | trinetrum           | NRRL 4599.9                                     |                   | UHSC 06-3449                                                                                       | USA               | Human scalp                                   |                                            | HM347195                                   |                                            | GQ505497                                   |                                            |
| <i>Fusarium fovearum</i>      | oxysporum           | NRRL 54147                                      |                   | CW 3913                                                                                            | Spain             | Human pericardial fluid                       |                                            | MW928808                                   |                                            | MW928839                                   | MH485100                                   |
|                               | oxysporum           | CBS 1102.86                                     |                   | CBS 120.665                                                                                        | Iran              | <i>Nicotiana tabacum</i>                      |                                            | MH484918                                   |                                            | MH523369                                   |                                            |
|                               | oxysporum           | NRRL 38302                                      |                   |                                                                                                    | Chile             | <i>Pinus radiata</i> , seedling stem          |                                            | JX171652                                   |                                            | JX170559                                   | KU171783                                   |
| <i>Fusarium fujikuroi</i>     | fujikuroi           | CBS 221.76                                      | ex-type           | BBA 12428 = BBA 63630 = IHFM 3821 = IMI 196086 = IMI 202879 = NRRL 13620 = NRRL 13998 = NRRL 22174 | Taiwan            | <i>Oryza sativa</i>                           |                                            | MW834005                                   |                                            | AF160279                                   |                                            |
|                               | fujikuroi           | NRRL 5538                                       |                   | ATCC 38941 = DAOM 225143 = IMI 300793 = IMI 375349 = NRRL A-26483 = NRRL 13566                     | China             | <i>Oryza sativa</i>                           |                                            | JX171570                                   |                                            | AF160279                                   |                                            |
| <i>Fusarium graminearum</i>   | trinetrum           | CBS 1436.10                                     | ex-type           | CPC 30862 = OS9a94                                                                                 | Iran              | <i>Agaricus bisporus</i>                      |                                            | U970760                                    |                                            | U970760                                    |                                            |
|                               | sambucium           | NRRL 36905                                      |                   |                                                                                                    | USA               | <i>Trichium aestivum</i>                      |                                            | KM361646                                   |                                            | DM959742                                   |                                            |
| <i>Fusarium graminearum</i>   | fujikuroi           | NRRL 26131                                      | ex-type           | CBS 428.97 = DAOM 225124 = FRC M-8014 = IMI 375330 = MRC 6647 = PREM 51878                         | South Africa      | <i>Trichium aestivum</i>                      |                                            | KF466329                                   |                                            | KF466406                                   | KF466439                                   |
|                               | oxysporum           | CBS 1447.45                                     |                   | CPC 25804                                                                                          | South Africa      | <i>Glycine max</i>                            |                                            | MH484941                                   |                                            | MH485032                                   | MH485123                                   |
|                               | oxysporum           | CBS 1447.46                                     |                   | CPC 25808                                                                                          | South Africa      | <i>Glycine max</i>                            |                                            | MH484941                                   |                                            | MH485032                                   |                                            |
|                               | oxysporum           | CBS 176.33                                      | ex-type           | NRRL 36286                                                                                         | South Africa      | <i>Linum usitatissimum</i>                    |                                            | MH484942                                   |                                            | MH485033                                   | MH485124                                   |
|                               | oxysporum           | CBS 214.49                                      |                   | LCF F-245 = NRRL 36356                                                                             | Argentina         | <i>Gossypium hirsutum</i>                     |                                            | MH484686                                   |                                            | MH484959                                   | MH485050                                   |
|                               | oxysporum           | CBS 1166.11                                     |                   |                                                                                                    | Ivory Coast       | <i>Gossypium hirsutum</i>                     |                                            | MH484687                                   |                                            | MH484960                                   | MH485051                                   |
|                               | oxysporum           | CBS 1166.12                                     |                   |                                                                                                    | Ivory Coast       | <i>Gossypium hirsutum</i>                     |                                            | MH484725                                   |                                            | MH484907                                   | MH485089                                   |
|                               | oxysporum           | CBS 1166.13                                     |                   |                                                                                                    | Ivory Coast       | <i>Gossypium hirsutum</i>                     |                                            | MH484726                                   |                                            | MH484908                                   | MH485090                                   |
| <i>Fusarium graminearum</i>   | incarnatum-equiseti | NRRL 43635                                      | ex-type           | NRRL 31084                                                                                         | USA               | Horse                                         |                                            | MH484727                                   |                                            | MH484909                                   | MH485091                                   |
|                               | sambucium           | CBS 1236.57                                     |                   | NRRL 31084                                                                                         | USA               | Corn                                          |                                            | GQ505673                                   |                                            | GQ505662                                   |                                            |
|                               | sambucium           | CBS 1366.09                                     | ex-epitype        | TMW 4.0157                                                                                         | Germany           | <i>Hordeum vulgare</i>                        |                                            | JX171531                                   |                                            | HM74A693                                   |                                            |
|                               | oxysporum           | lnaCC F833                                      |                   |                                                                                                    | Indonesia         | <i>Musa sp. var. Pisang-Awak</i>              |                                            | MW928826                                   |                                            | MW928838                                   |                                            |
| <i>Fusarium graminearum</i>   | oxysporum           | lnaCC F850                                      | ex-type           |                                                                                                    | Indonesia         | <i>Musa acuminata</i> var. Pisang Ambon       |                                            | LS479548                                   |                                            | LS479744                                   |                                            |
|                               | oxysporum           | lnaCC F855                                      |                   |                                                                                                    | Indonesia         | <i>Musa acuminata</i> var. Pisang Ambon Lumut |                                            | LS479592                                   |                                            | LS479794                                   |                                            |
|                               | oxysporum           | lnaCC F861                                      |                   |                                                                                                    | Indonesia         | <i>Musa acuminata</i> var. Cavendish          |                                            | LS479597                                   |                                            | LS479797                                   |                                            |
|                               | oxysporum           | lnaCC F887                                      |                   |                                                                                                    | Indonesia         | <i>Musa sp. var. Pisang-Siem</i>              |                                            | LS479830                                   |                                            | LS479830                                   |                                            |
| <i>Fusarium hexoseptatum</i>  | oxysporum           | lnaCC F866                                      | ex-type           |                                                                                                    | Indonesia         | <i>Musa acuminata</i> var. Pisang Jumbo       |                                            | LS479359                                   |                                            | LS479805                                   |                                            |
|                               | oxysporum           | CBS 1324.74                                     | ex-type           |                                                                                                    | South Africa      | <i>Haadia gardanii</i>                        |                                            | MH484929                                   |                                            | MH485020                                   | MH485111                                   |
|                               | oxysporum           | CBS 1324.76                                     |                   |                                                                                                    | South Africa      | <i>Haadia gardanii</i>                        |                                            | MH484930                                   |                                            | MH485021                                   | MH485112                                   |
|                               | oxysporum           | CBS 1324.77                                     |                   |                                                                                                    | South Africa      | <i>Haadia gardanii</i>                        |                                            | MH484931                                   |                                            | MH485022                                   | MH485113                                   |
| <i>Fusarium hostae</i>        | redolens            | FRC O-2071                                      |                   | NRRL 29888                                                                                         | USA               | Container-grown hosta plants                  |                                            | MH484945                                   |                                            | MT409453                                   |                                            |
|                               | redolens            | FRC O-2074                                      |                   | NRRL 29889                                                                                         | USA               | Container-grown hosta plants                  |                                            | JX171640                                   |                                            | AF329034                                   |                                            |
| <i>Fusarium inflexum</i>      | oxysporum           | CBS 716.74                                      | ex-type           | ATCC 32213 = BBA 63203 = DAOM 225130 = DSM 63202 = IMI 375336 = NRRL 20433                         | Germany           | <i>Vicia faba</i> , stem                      |                                            | JX171527                                   |                                            | AF008479                                   | U34435                                     |
|                               | oxysporum           | CGMCC 3.19496                                   | ex-type           | LC12165                                                                                            | China             | <i>Ipomoea aquatica</i>                       |                                            | MK289559                                   |                                            | MK289599                                   |                                            |
|                               | incarnatum-equiseti | CG1099                                          |                   |                                                                                                    | China             | <i>Rhodoandron pulchrum</i>                   |                                            | MK289575                                   |                                            | MK289575                                   |                                            |
|                               | incarnatum-equiseti | CQ1132                                          |                   |                                                                                                    | China             | <i>Vicia major</i>                            |                                            | MK289727                                   |                                            | MK289727                                   |                                            |
|                               | incarnatum-equiseti | LC0166                                          |                   |                                                                                                    | China             | <i>Solanum lycopersicum</i>                   |                                            | MK289862                                   |                                            | MK289574                                   |                                            |
|                               | incarnatum-equiseti | LC0455                                          |                   |                                                                                                    | China             | <i>Hosta sp.</i>                              |                                            | MK289848                                   |                                            | MK289579                                   |                                            |
|                               | incarnatum-equiseti | LC12162                                         |                   |                                                                                                    | China             | <i>Musa nana</i>                              |                                            | MK289733                                   |                                            | MK289580                                   |                                            |
|                               | incarnatum-equiseti | LC12163                                         |                   |                                                                                                    | China             | <i>Hibiscus sylvaticus</i>                    |                                            | MK289749                                   |                                            | MK289596                                   |                                            |
|                               | incarnatum-equiseti | LC12166                                         |                   |                                                                                                    | China             | <i>Lagerflora sicaria</i>                     |                                            | MK289750                                   |                                            | MK289597                                   |                                            |
|                               | incarnatum-equiseti | NRRL 34034                                      |                   | UHSC 04-1167                                                                                       | USA               | Human leg                                     |                                            | MK289753                                   |                                            | MK289600                                   |                                            |
|                               | incarnatum-equiseti | NRRL 43637                                      |                   | UHSC 96-1394                                                                                       | USA               | Human leg                                     |                                            | GQ505814                                   |                                            | GQ505636                                   |                                            |
|                               | incarnatum-equiseti | NRRL 43637                                      |                   | UHSC 05-1729                                                                                       | USA               | Human                                         |                                            | GQ505817                                   |                                            | GQ505639                                   |                                            |
|                               | incarnatum-equiseti | NRRL 43640                                      |                   | UHSC 04-123                                                                                        | USA               | Doog nose                                     |                                            | GQ505842                                   |                                            | GQ505664                                   |                                            |
| <i>Fusarium ironicum</i>      | trinetrum           | CBS 4336.08                                     | ex-type           | CPC 30860                                                                                          | USA               | <i>Agaricus bisporus</i>                      |                                            | HM347191                                   |                                            | GQ505667                                   |                                            |
|                               | trinetrum           | CBS 4336.11                                     |                   | CPC 30863                                                                                          | Iran              | <i>Agaricus bisporus</i>                      |                                            | L1970757                                   |                                            | L1970757                                   |                                            |
|                               | triticola           | CBS 1477.73                                     | ex-type           | CPC 37962 = UBCCC-A-119001                                                                         | France            | <i>Juglans regia</i> , bud                    |                                            | L1970758                                   |                                            | L1970785                                   |                                            |
|                               | triticola           | CBS 1477.74                                     |                   | CPC 37956 = UBCCC-A-101147                                                                         | France            | <i>Juglans regia</i> , bud                    |                                            | MZ078215                                   |                                            | MZ078215                                   |                                            |
|                               | triticola           | CBS 1477.77                                     |                   | CPC 37957 = UBCCC-A-102014                                                                         | France            | <i>Juniperus sp.</i>                          |                                            | MZ078216                                   |                                            | MZ078244                                   |                                            |
|                               | triticola           | CBS 1477.75                                     |                   |                                                                                                    | France            | Eggs                                          |                                            | MZ078217                                   |                                            | MZ078245                                   |                                            |
| <i>Fusarium kalmianense</i>   | oxysporum           | lnaCC F917                                      | ex-type           |                                                                                                    | Indonesia         | <i>Musa acuminata</i> var. Pisang Ambon       |                                            | LS479497                                   |                                            | LS479690                                   |                                            |
|                               | oxysporum           | lnaCC F918                                      |                   |                                                                                                    | Indonesia         | <i>Musa acuminata</i> var. Pisang Ambon       |                                            | LS479497                                   |                                            | LS479691                                   |                                            |

**Table S1 (Continued)**

| Species                        | Species complex | Culture accession number used in phylogenetic trees <sup>1</sup> | Status of culture | Accession number in other culture or working collections <sup>2</sup>     | Substrate of origin                        | Country of origin    | cmcA      | rpb1            | rpb2 (part 1) | rpb2 (part 2) | tef1      | tub2     |
|--------------------------------|-----------------|------------------------------------------------------------------|-------------------|---------------------------------------------------------------------------|--------------------------------------------|----------------------|-----------|-----------------|---------------|---------------|-----------|----------|
| <i>Fusarium lateranum</i>      |                 | inactC F922                                                      | -                 |                                                                           | <i>Musa acuminata</i> var. Pisang          | Indonesia            |           |                 | LS479246      | -             | LS479695  | -        |
| <i>Fusarium lateranum</i>      |                 | incarnatum-equiseti                                              | ex-type           | CBS130185 = IMI 300797 = NRRL 20423                                       | Ambon                                      | India                | GQ505505  | JX171467        | JX171581      | -             | GQ505593  | -        |
| <i>Fusarium lateranum</i>      |                 | incarnatum-equiseti                                              | ex-type           | CBS102300 = BBA 70843                                                     | Lizard skin                                | India                | GQ505555  | -               | GQ505821      | -             | GQ505821  | -        |
| <i>Fusarium lactis</i>         |                 | fujiurai                                                         | ex-epitype        | CBS41197 = DAOM 225145 = IMI 375351 = NRRL 25200                          | <i>Ficus carica</i>                        | USA                  | AF158325  | L1996201        | L1996149      | -             | AF160272  | -        |
| <i>Fusarium langueusens</i>    |                 | oxypporum                                                        | -                 | ATCC 66046 = NRRL 36465                                                   | <i>Solanum lycopersicum</i>                | Israel               | MH484708  | -               | MH484890      | -             | MH484981  | MH485072 |
| <i>Fusarium langueusens</i>    |                 | oxypporum                                                        | -                 | NRRL 36541 = NRRL 36465                                                   | <i>Solanum lycopersicum</i>                | Morocco              | MH484698  | -               | MH484880      | -             | MH484971  | MH485062 |
| <i>Fusarium langueusens</i>    |                 | oxypporum                                                        | -                 | CBS 645.78                                                                | <i>Solanum lycopersicum</i>                | Morocco              | MH484698  | -               | MH484880      | -             | MH484971  | MH485063 |
| <i>Fusarium langueusens</i>    |                 | oxypporum                                                        | -                 | CBS 646.78                                                                | <i>Solanum lycopersicum</i>                | Morocco              | MH484698  | -               | MH484880      | -             | MH484971  | MH485063 |
| <i>Fusarium libertatis</i>     |                 | oxypporum                                                        | -                 | NRRL 36532                                                                | <i>Lycopodium esculentum</i>               | Israel               | MH484713  | -               | MH484895      | -             | MH484986  | MH485115 |
| <i>Fusarium libertatis</i>     |                 | oxypporum                                                        | -                 | CPC 25788                                                                 | <i>Aspalathus</i> sp.                      | South Africa         | MH484752  | -               | MH484933      | -             | MH485004  | MH485114 |
| <i>Fusarium libertatis</i>     |                 | oxypporum                                                        | -                 | CPC 25782                                                                 | <i>Aspalathus</i> sp.                      | South Africa         | MH484750  | -               | MH484932      | -             | MH485003  | MH485116 |
| <i>Fusarium longicaudatum</i>  |                 | oxypporum                                                        | -                 | CPC 28465                                                                 | Rock surface                               | South Africa         | MH484762  | -               | MH484944      | -             | MH485035  | -        |
| <i>Fusarium longicaudatum</i>  |                 | incarnatum-equiseti                                              | ex-type           | ATCC 24370 = IMI 160825 = NRRL 25477                                      | Alfalfa                                    | Tanzania             | MNL170414 | -               | MNL170414     | -             | MNL170481 | -        |
| <i>Fusarium longicaudatum</i>  |                 | incarnatum-equiseti                                              | ex-type           | NRRL 36372                                                                | Alfalfa                                    | Netherlands Antilles | GQ505561  | -               | GQ505827      | -             | GQ505649  | -        |
| <i>Fusarium louisianense</i>   |                 | sambucinum                                                       | -                 | CBS127525                                                                 | <i>Triticum aestivum</i> , seed            | USA                  | KM889654  | -               | KM889652      | -             | KM889652  | -        |
| <i>Fusarium louisianense</i>   |                 | sambucinum                                                       | -                 | NRRL 54197                                                                | <i>Triticum aestivum</i> , seed            | USA                  | KM889655  | -               | KM889657      | -             | KM889657  | -        |
| <i>Fusarium madense</i>        |                 | fujiurai                                                         | ex-type           | CPC 38330                                                                 | <i>Anachis hypogaea</i>                    | Nigeria              | LR792534  | -               | LR792588      | -             | LR792624  | -        |
| <i>Fusarium madense</i>        |                 | fujiurai                                                         | ex-type           | CBS146656                                                                 | <i>Anachis hypogaea</i>                    | Nigeria              | LR792574  | -               | LR792588      | -             | LR792624  | -        |
| <i>Fusarium meridionale</i>    |                 | sambucinum                                                       | -                 | CPC 38344                                                                 | <i>Anachis hypogaea</i>                    | Nigeria              | LR792575  | -               | LR792589      | -             | LR792625  | -        |
| <i>Fusarium mesoamericanum</i> |                 | sambucinum                                                       | -                 | NRRL 28436                                                                | <i>Citrus sinensis</i> , twig              | New Caledonia        | KM361642  | -               | KM361660      | -             | AF212435  | -        |
| <i>Fusarium mesoamericanum</i> |                 | sambucinum                                                       | -                 | NRRL 25797                                                                | <i>Musa</i> sp., fruit                     | Honduras             | KM361657  | -               | KM361657      | -             | AF212441  | -        |
| <i>Fusarium mucidum</i>        |                 | incarnatum-equiseti                                              | ex-type           | CBS102395                                                                 | <i>Anacardium occidentale</i> , mouldy nut | El Salvador          | MNL170351 | -               | MNL170418     | -             | MNL170485 | -        |
| <i>Fusarium musae</i>          |                 | fujiurai                                                         | ex-type           | CBS624.87 = NRRL 25059                                                    | <i>Musa acuminata</i>                      | Indonesia            | LS479431  | -               | LS479431      | -             | LS479447  | -        |
| <i>Fusarium napoliforme</i>    |                 | fujiurai                                                         | ex-type           | CBS748.97 = DAOM 225147 = FRC M-3563 = IMI 375353 = MRC 4144 = NRRL 13604 | <i>Pennisetum typhoides</i>                | Honduras             | FN52108   | JACCKU010000017 | FN52108       | -             | FN52086   | -        |
| <i>Fusarium napoliforme</i>    |                 | fujiurai                                                         | ex-type           | NRRL 26861 = NRRL 26922                                                   | <i>Pennisetum typhoides</i>                | Namibia              | HM347136  | -               | EF470117      | -             | AF160266  | -        |
| <i>Fusarium necrophilum</i>    |                 | incarnatum-equiseti                                              | ex-type           | CBS127503                                                                 | Soil                                       | France               | GQ505513  | -               | GQ505779      | -             | GQ505601  | -        |
| <i>Fusarium necrophilum</i>    |                 | sambucinum                                                       | ex-type           | CBS127503                                                                 | <i>Oryza sativa</i>                        | Nepal                | KM361668  | -               | KM361668      | -             | KM361668  | -        |
| <i>Fusarium nenbergiae</i>     |                 | oxypporum                                                        | -                 | CPC 5306                                                                  | <i>Agathosma betulina</i>                  | South Africa         | MH484721  | -               | MH484903      | -             | MH484994  | MH485085 |
| <i>Fusarium nenbergiae</i>     |                 | oxypporum                                                        | -                 | CBS115424                                                                 | <i>Agathosma betulina</i>                  | South Africa         | MH484724  | -               | MH484906      | -             | MH484997  | MH485088 |
| <i>Fusarium nenbergiae</i>     |                 | oxypporum                                                        | -                 | G1591.17                                                                  | Tulip roots                                | USA                  | MH484737  | -               | MH484919      | -             | MH485010  | MH485046 |
| <i>Fusarium nenbergiae</i>     |                 | oxypporum                                                        | -                 | NRRL 26368                                                                | <i>Secale cereale</i>                      | USA                  | MH484682  | -               | MH484864      | -             | MH484955  | MH485047 |
| <i>Fusarium nenbergiae</i>     |                 | oxypporum                                                        | -                 | NRRL 26374                                                                | Amputated human toe                        | USA                  | MH484743  | -               | MH484925      | -             | MH485016  | MH485107 |
| <i>Fusarium nenbergiae</i>     |                 | oxypporum                                                        | -                 | NRRL 26374                                                                | Human leg ulcer                            | USA                  | MH484744  | -               | MH484926      | -             | MH485017  | MH485047 |
| <i>Fusarium nenbergiae</i>     |                 | oxypporum                                                        | -                 | NRRL 36261                                                                | <i>Musa</i> sp.                            | USA                  | MH484683  | -               | MH484865      | -             | MH484956  | MH485047 |
| <i>Fusarium nenbergiae</i>     |                 | oxypporum                                                        | -                 | BBA 62355 = NRRL 22549                                                    | <i>Passiflora edulis</i>                   | Brazil               | MH484700  | -               | MH484882      | -             | MH484973  | MH485064 |
| <i>Fusarium nenbergiae</i>     |                 | oxypporum                                                        | -                 | NRRL 36546                                                                | <i>Solanum lycopersicum</i>                | Netherlands          | MH484695  | -               | MH484877      | -             | MH484968  | MH485059 |
| <i>Fusarium nenbergiae</i>     |                 | oxypporum                                                        | -                 | CBS 840.88                                                                | <i>Dianthus caryophyllus</i>               | Netherlands          | MH484708  | -               | MH484887      | -             | MH484978  | MH485069 |
| <i>Fusarium nenbergiae</i>     |                 | oxypporum                                                        | -                 | CPC 30807                                                                 | -                                          | Netherlands          | MH484768  | -               | MH484950      | -             | MH485041  | MH485132 |
| <i>Fusarium oerlatissimum</i>  |                 | oxypporum                                                        | -                 | BBA11103 = NRRL 22550                                                     | <i>Abutilon julibrissin</i>                | Iran                 | MH484696  | -               | MH484878      | -             | MH484969  | MH485060 |
| <i>Fusarium oerlatissimum</i>  |                 | oxypporum                                                        | -                 | CBS 794.70                                                                | <i>Musa</i> sp. var. Pisang Kepok          | Indonesia            | LS479556  | -               | LS479304      | -             | LS479753  | -        |
| <i>Fusarium oerlatissimum</i>  |                 | oxypporum                                                        | -                 | inactC F817                                                               | <i>Musa</i> sp. var. Pisang Raja           | Indonesia            | LS479618  | -               | LS479386      | -             | LS479828  | -        |
| <i>Fusarium oerlatissimum</i>  |                 | oxypporum                                                        | -                 | inactC F822                                                               | <i>Musa</i> sp. var. Pisang Raja           | Indonesia            | LS479618  | -               | LS479386      | -             | LS479828  | -        |
| <i>Fusarium oerlatissimum</i>  |                 | oxypporum                                                        | -                 | inactC F823                                                               | <i>Musa</i> sp. var. Pisang Raja           | Indonesia            | LS479618  | -               | LS479386      | -             | LS479828  | -        |
| <i>Fusarium oerlatissimum</i>  |                 | oxypporum                                                        | -                 | inactC F886                                                               | <i>Musa</i> sp. var. Pisang Kepok          | Indonesia            | LS479628  | -               | LS479398      | -             | LS479827  | -        |
| <i>Fusarium oerlatissimum</i>  |                 | oxypporum                                                        | -                 | inactC F904                                                               | <i>Musa</i> sp. var. Pisang Kepok          | Indonesia            | LS479637  | -               | LS479407      | -             | LS479847  | -        |
| <i>Fusarium oerlatissimum</i>  |                 | oxypporum                                                        | -                 | inactC F913                                                               | <i>Musa</i> sp. var. Pisang Kepok          | Indonesia            | LS479492  | -               | LS479236      | -             | LS479685  | -        |
| <i>Fusarium oerlatissimum</i>  |                 | oxypporum                                                        | -                 | inactC F914                                                               | <i>Musa</i> sp. var. Pisang Kepok          | Indonesia            | LS479493  | -               | LS479237      | -             | LS479686  | -        |
| <i>Fusarium oerlatissimum</i>  |                 | oxypporum                                                        | -                 | inactC F948                                                               | <i>Musa acuminata</i> var. Pisang Barangan | Indonesia            | LS479527  | -               | LS479273      | -             | LS479722  | -        |
| <i>Fusarium oerlatissimum</i>  |                 | oxypporum                                                        | -                 | CBS144134                                                                 | <i>Solanum tuberosum</i>                   | Germany              | MH484771  | -               | MH484953      | -             | MH485044  | MH485135 |
| <i>Fusarium oerlatissimum</i>  |                 | oxypporum                                                        | -                 | CBS144135                                                                 | <i>Solanum tuberosum</i>                   | Germany              | MH484772  | -               | MH484954      | -             | MH485045  | MH485136 |
| <i>Fusarium oerlatissimum</i>  |                 | oxypporum                                                        | -                 | CBS221.49                                                                 | <i>Camellia sinensis</i>                   | South East Asia      | MH484690  | -               | MH484872      | -             | MH484963  | MH485054 |
| <i>Fusarium oerlatissimum</i>  |                 | oxypporum                                                        | -                 | CPC 25822                                                                 | <i>Protea</i> sp.                          | South Africa         | MH484761  | -               | MH484943      | -             | MH485034  | MH485125 |
| <i>Fusarium oerlatissimum</i>  |                 | oxypporum                                                        | -                 | CBS144750                                                                 | <i>Allianderon dichotomum</i>              | South Africa         | MH484769  | -               | MH484951      | -             | MH485042  | MH485133 |
| <i>Fusarium oerlatissimum</i>  |                 | oxypporum                                                        | -                 | CBS144751                                                                 | <i>Allianderon dichotomum</i>              | South Africa         | MH484770  | -               | MH484952      | -             | MH485043  | MH485134 |
| <i>Fusarium oerlatissimum</i>  |                 | oxypporum                                                        | -                 | FocRaeel.0124                                                             | <i>Musa acuminata</i> cv. Grand Naine-AAA  | Cuba                 | LS479483  | -               | LS479483      | -             | LS479675  | -        |
| <i>Fusarium oerlatissimum</i>  |                 | oxypporum                                                        | -                 | inactC F826                                                               | <i>Musa</i> sp. var. Pisang Wak            | Indonesia            | LS479505  | -               | LS479251      | -             | LS479700  | -        |
| <i>Fusarium oerlatissimum</i>  |                 | oxypporum                                                        | -                 | inactC F971                                                               | <i>Musa</i> sp. var. Pisang Wak            | Indonesia            | LS479545  | -               | LS479292      | -             | LS479741  | -        |
| <i>Fusarium oerlatissimum</i>  |                 | oxypporum                                                        | -                 | inactC F995                                                               | <i>Musa acuminata</i> var. Pisang Kengkong | Indonesia            | LS479570  | -               | LS479318      | -             | LS479767  | -        |
| <i>Fusarium praegraminarum</i> |                 | sambucinum                                                       | -                 | NRRL 39664                                                                | Litter in corn field                       | New Zealand          | KX260125  | -               | KX260126      | -             | KX260126  | -        |
| <i>Fusarium praegraminarum</i> |                 | fujiurai                                                         | ex-type           | BBA 69002 = CBS 414.57 = IMI 376112                                       | <i>Zea mays</i>                            | Zimbabwe             | MT010896  | -               | MT010949      | -             | MT010980  | -        |
| <i>Fusarium praegraminarum</i> |                 | fujiurai                                                         | ex-type           | CBS 109956 = FRC R-5291                                                   | <i>Hordeum vulgare</i>                     | Australia            | JX171524  | -               | JX171637      | -             | AF121468  | -        |
| <i>Fusarium praegraminarum</i> |                 | sambucinum                                                       | -                 | BBA 69552 = CBS 417.97 = DAOM 225136 = FRC M-1166 = IMI 375342            | <i>Pennisetum typhoides</i>                | Nigeria              | MT010893  | -               | L1996152      | -             | AF160263  | -        |
| <i>Fusarium pseudonygamai</i>  |                 | fujiurai                                                         | ex-type           | NRRL 25208                                                                | <i>Ficus carica</i>                        | USA                  | KF466435  | -               | KF466401      | -             | KF466423  | -        |
| <i>Fusarium pseudonygamai</i>  |                 | fujiurai                                                         | ex-type           | IM1375343                                                                 | <i>Dianthus caryophyllus</i>               | Germany              | MT409433  | -               | MT409433      | -             | MT409453  | -        |
| <i>Fusarium pseudonygamai</i>  |                 | redolens                                                         | -                 | ATCC 16067 = BBA 9526 = CBS 360.87 = DSM 62380 = NRRL 20426 = NRRL 25600  | <i>Pseudotsuga menziesii</i>               | Canada               | JX171503  | -               | JX171616      | -             | -         | -        |
| <i>Fusarium pseudonygamai</i>  |                 | redolens                                                         | -                 | DAOM 225128 = IMI 375334 = NRRL 22901                                     | <i>Lilacens filix</i>                      | Denmark              | JF740960  | -               | JF741076      | -             | JF740748  | -        |
| <i>Fusarium pseudonygamai</i>  |                 | redolens                                                         | -                 | ARSEF 40.11                                                               | Feline granuloma                           | USA                  | KC083500  | -               | KC083563      | -             | KC083521  | -        |
| <i>Fusarium pseudonygamai</i>  |                 | redolens                                                         | -                 | D16-449                                                                   | <i>Sophora japonica</i>                    | Germany              | MW928816  | -               | MW928816      | -             | MW928816  | -        |
| <i>Fusarium pseudonygamai</i>  |                 | trichinum                                                        | -                 | BBA 64657 = NRRL 20684                                                    | <i>Citrus sinensis</i> , twigs canker      | Italy                | L1746286  | -               | L1746306      | -             | L1746193  | -        |
| <i>Fusarium pseudonygamai</i>  |                 | trichinum                                                        | -                 | CPC 26973                                                                 | <i>Citrus sinensis</i> , twigs canker      | Italy                | L1746286  | -               | L1746306      | -             | L1746193  | -        |

**Table S1 (Continued)**

| Species                        | Species complex     | Culture accession number used in phylogenetic trees <sup>1</sup> | Status of culture                                | Accession number in other culture or working collections <sup>1</sup> | Substrate of origin                                                   | Country of origin | Genbank accession numbers <sup>1,2</sup> |             |                      |                      |             |
|--------------------------------|---------------------|------------------------------------------------------------------|--------------------------------------------------|-----------------------------------------------------------------------|-----------------------------------------------------------------------|-------------------|------------------------------------------|-------------|----------------------|----------------------|-------------|
|                                |                     |                                                                  |                                                  |                                                                       |                                                                       |                   | <i>cmdA</i>                              | <i>rpb1</i> | <i>rpb2</i> (part 1) | <i>rpb2</i> (part 2) | <i>tef1</i> |
| <i>Fusarium songamense</i>     | oxysporum           | InaCC P960                                                       | ex-type                                          | -                                                                     | <i>Musa</i> sp. var. Pisang Kepok                                     | Indonesia         | -                                        | LS479283    | LS479283             | LS479283             | -           |
| <i>Fusarium scripi</i>         | oxysporum           | InaCC P961                                                       | ex-epitype                                       | -                                                                     | <i>Musa</i> sp. var. Pisang Kepok                                     | Indonesia         | -                                        | LS479284    | LS479284             | LS479284             | -           |
| <i>Fusarium serpentinum</i>    | incarnatum-equiseti | CBS 447.84                                                       | ex-type                                          | FRC R-0252 = NRRL 36478                                               | Pasture soil                                                          | Australia         | -                                        | GDS05832    | GDS05832             | GDS05832             | -           |
| <i>Fusarium sinense</i>        | tricinum            | CBS 119880                                                       | ex-type                                          | BBA 62209 = NRRL 1813                                                 | -                                                                     | -                 | -                                        | MIN170365   | MIN170365            | MIN170365            | -           |
| <i>Fusarium</i> sp.            | oxysporum           | CBS 122710                                                       | ex-type                                          | IBE 000007                                                            | <i>Triticum aestivum</i>                                              | China             | -                                        | MH484898    | MH484898             | MH484898             | -           |
| <i>Fusarium</i> sp.            | oxysporum           | CBS 102030                                                       | -                                                | -                                                                     | <i>Musa sapientum</i> cv. Pisang Mas                                  | Malaysia          | -                                        | MH484898    | MH484898             | MH484898             | -           |
| <i>Fusarium spatium</i>        | oxysporum           | CBS 130310                                                       | ex-type                                          | CK A2 = NRRL 25603                                                    | <i>Musa</i> sp.                                                       | Australia         | -                                        | MH484922    | MH484922             | MH484922             | -           |
| <i>Fusarium</i> sp.            | redolens            | NRRL 66896                                                       | ex-type                                          | -                                                                     | Rhizosphere of <i>Macarochloa tenacissima</i>                         | Tunisia           | -                                        | MT409449    | MT409449             | MT409449             | -           |
| <i>Fusarium strobiliforme</i>  | fujikuroi           | NRRL 25623                                                       | ex-type                                          | -                                                                     | <i>Manihara indica</i>                                                | South Africa      | -                                        | AF158353    | AF158353             | AF158353             | -           |
| <i>Fusarium subcaecale</i>     | sambucinum          | CBS 144706                                                       | ex-type                                          | F1478 = NRRL 66764 = URM 3329                                         | <i>Hardara vulgaris</i>                                               | Brazil            | -                                        | MH706973    | MH706973             | MH706973             | -           |
| <i>Fusarium sudanense</i>      | fujikuroi           | CBS 454.97                                                       | ex-type                                          | BBA 65869 = NRRL 25451 = NRRL 26793                                   | <i>Striga hermannthica</i>                                            | Sudan             | -                                        | LT996185    | LT996185             | LT996185             | -           |
| <i>Fusarium tarachomyces</i>   | oxysporum           | CBS 102028                                                       | -                                                | NRRL 36117                                                            | <i>Musa sapientum</i> cv. Pisang awak legio                           | Malaysia          | -                                        | MH484897    | MH484897             | MH484897             | -           |
| <i>Fusarium toxicum</i>        | oxysporum           | CBS 130310                                                       | ex-type                                          | -                                                                     | <i>Musa</i> sp. var. Monthan                                          | Brazil            | -                                        | LS479458    | LS479458             | LS479458             | -           |
| <i>Fusarium tricinum</i>       | tricinum            | InaCC P957                                                       | ex-type                                          | -                                                                     | <i>Musa acuminata</i> var. Pisang Baranigh                            | Indonesia         | -                                        | LS479279    | LS479279             | LS479279             | -           |
| <i>Fusarium triseptatum</i>    | oxysporum           | InaCC P958                                                       | ex-type                                          | -                                                                     | <i>Musa acuminata</i> var. Pisang Baranigh                            | Indonesia         | -                                        | LS479280    | LS479280             | LS479280             | -           |
| <i>Fusarium tendrecrens</i>    | oxysporum           | InaCC P959                                                       | -                                                | -                                                                     | <i>Musa acuminata</i> var. Pisang Baranigh                            | Indonesia         | -                                        | LS479281    | LS479281             | LS479281             | -           |
| <i>Fusarium terricola</i>      | oxysporum           | NRRL 36113                                                       | ex-type                                          | CBS 102024                                                            | <i>Musa sapientum</i> var. Pisang Baranigh                            | Indonesia         | -                                        | LS479217    | LS479217             | LS479217             | -           |
| <i>Fusarium tetraba</i>        | oxysporum           | NRRL 37622                                                       | -                                                | T247                                                                  | <i>Musa sapientum</i> cv. Harare                                      | Malawi            | -                                        | LS479203    | LS479203             | LS479203             | -           |
| <i>Fusarium taralobum</i>      | tricinum            | NRRL 54005                                                       | ex-type                                          | PHW815                                                                | <i>Raphanus</i> <i>Arabis</i> sp.                                     | -                 | -                                        | LS479226    | LS479226             | LS479226             | -           |
| <i>Fusarium toxicum</i>        | fujikuroi           | CBS 483.94                                                       | ex-type                                          | FRC M-1650                                                            | Soil                                                                  | Australia         | -                                        | LT996156    | LT996156             | LT996156             | -           |
| <i>Fusarium tricinum</i>       | tricinum            | NRRL 66243                                                       | ex-type                                          | NRRL 144400 = RBG 5361                                                | <i>Sorghum interjectum</i>                                            | Australia         | -                                        | KP083275    | KP083275             | KP083275             | -           |
| <i>Fusarium tricinum</i>       | tricinum            | NRRL 52772                                                       | -                                                | BBA 64990 = NRRL 13919                                                | <i>Buxus</i> sp.                                                      | Netherlands       | -                                        | JX171615    | JX171615             | JX171615             | -           |
| <i>Fusarium tricinum</i>       | tricinum            | CBS 406.86                                                       | ex-type                                          | FRC R-8507 = IMI 309347 = NRRL 25796                                  | Soil                                                                  | Germany           | -                                        | MIN170441   | MIN170441            | MIN170441            | -           |
| <i>Fusarium tricinum</i>       | tricinum            | CBS 233.50                                                       | ex-type of <i>F. citriforme</i>                  | -                                                                     | <i>Plantain</i> <i>Sativum</i> , grain                                | Finland           | -                                        | MW928802    | MW928802             | MW928802             | -           |
| <i>Fusarium tricinum</i>       | tricinum            | CBS 393.93                                                       | ex-epitype                                       | BBA 64485 = NRRL 25481                                                | <i>Triticum aestivum</i> , culm base                                  | Germany           | -                                        | JX171516    | JX171516             | JX171516             | -           |
| <i>Fusarium triseptatum</i>    | oxysporum           | CBS 1196619                                                      | -                                                | -                                                                     | <i>Gossypium hirsutum</i>                                             | Ivory Coast       | -                                        | MH484910    | MH484910             | MH484910             | -           |
| <i>Fusarium triseptatum</i>    | oxysporum           | CBS 119665                                                       | -                                                | -                                                                     | Sago starch                                                           | Papua New Guinea  | -                                        | MH484916    | MH484916             | MH484916             | -           |
| <i>Fusarium triseptatum</i>    | oxysporum           | CBS 130302                                                       | ex-type                                          | FRC 755 = NRRL 26360                                                  | Human eye                                                             | USA               | -                                        | MH484924    | MH484924             | MH484924             | -           |
| <i>Fusarium triseptatum</i>    | oxysporum           | CBS 258.50                                                       | ex-type                                          | NRRL 36389                                                            | <i>Ipomoea batatas</i>                                                | USA               | -                                        | MH484873    | MH484873             | MH484873             | -           |
| <i>Fusarium triseptatum</i>    | fujikuroi           | CML 262                                                          | ex-type                                          | CMW 3655 = KSU 16195 = NRRL 53984                                     | <i>Mangifera indica</i>                                               | Brazil            | -                                        | LR792583    | LR792583             | LR792583             | -           |
| <i>Fusarium triseptatum</i>    | sambucinum          | CBS 123752                                                       | ex-type                                          | NRRL 145681 = TG-2662/O                                               | <i>Avena sativa</i> , oat seed                                        | Russia            | -                                        | KM361666    | KM361666             | KM361666             | -           |
| <i>Fusarium verticilloides</i> | fujikuroi           | CBS 218.76                                                       | ex-epitype                                       | BBA 11782 = DSM 62264 = IMI 202875 = NRRL 13993                       | <i>Zea mays</i>                                                       | Germany           | -                                        | MW928835    | MW928835             | MW928835             | -           |
| <i>Fusarium verticilloides</i> | fujikuroi           | NRRL 20956                                                       | -                                                | FRC M-3125 = JFL 00149 = P15- F237                                    | <i>Zea mays</i>                                                       | USA               | -                                        | MIN193929   | MIN193929            | MIN193929            | -           |
| <i>Fusarium veterinarium</i>   | oxysporum           | CBS 109898                                                       | ex-type                                          | NRRL 36163                                                            | Shank petionium                                                       | Netherlands       | -                                        | MH484717    | MH484717             | MH484717             | -           |
| <i>Fusarium veterinarium</i>   | oxysporum           | CBS 117787                                                       | -                                                | -                                                                     | Swab sample near filling apparatus                                    | Netherlands       | -                                        | MH484912    | MH484912             | MH484912             | -           |
| <i>Fusarium volatilis</i>      | oxysporum           | CBS 117790                                                       | -                                                | -                                                                     | Swab sample near filling apparatus                                    | Netherlands       | -                                        | MH484913    | MH484913             | MH484913             | -           |
| <i>Fusarium volatilis</i>      | oxysporum           | CBS 117792                                                       | ex-type                                          | IHEM 27514                                                            | Pasteurized milk-based product                                        | Netherlands       | -                                        | MH484915    | MH484915             | MH484915             | -           |
| <i>Fusarium volatilis</i>      | fujikuroi           | CBS 143874                                                       | -                                                | -                                                                     | Human, bronchoalveolar lavage effusion of patient with lung infection | French Guiana     | -                                        | RS96006     | RS96006              | RS96006              | -           |
| <i>Fusarium varosii</i>        | sambucinum          | NRRL 37605                                                       | ex-type                                          | -                                                                     | <i>Triticum aestivum</i>                                              | Hungary           | -                                        | KM361665    | KM361665             | KM361665             | -           |
| <i>Necossospora bataticola</i> | oxysporum           | CBS 144397                                                       | ex-type                                          | BBA 64683 = NRRL 22400                                                | <i>Ipomoea batatas</i>                                                | USA               | -                                        | EJ329509    | EJ329509             | EJ329509             | -           |
| <i>Necossospora bataticola</i> | oxysporum           | CBS 144398                                                       | ex-type                                          | BBA 64954 = FRC 5-0567 = NRRL 22402                                   | <i>Ipomoea batatas</i>                                                | USA               | -                                        | FJ240381    | FJ240381             | FJ240381             | -           |
| <i>Necossospora bataticola</i> | oxysporum           | CBS 146511                                                       | ex-type                                          | CPC 37129 = VG302                                                     | <i>Citrus sinensis</i> , crown                                        | South Africa      | -                                        | MW248745    | MW248745             | MW248745             | -           |
| <i>Necossospora bataticola</i> | oxysporum           | CBS 146513                                                       | ex-type                                          | CPC 37131 = VG343                                                     | <i>Citrus sinensis</i> , crown                                        | South Africa      | -                                        | MW446579    | MW446579             | MW446579             | -           |
| <i>Necossospora bataticola</i> | oxysporum           | CBS 144386                                                       | ex-type                                          | MUCL 11420                                                            | <i>Citrus sinensis</i> , crown                                        | France            | -                                        | RS93823     | RS93823              | RS93823              | -           |
| <i>Necossospora bataticola</i> | oxysporum           | NRRL 46596                                                       | -                                                | -                                                                     | Human toenail                                                         | Italy             | -                                        | GJ170952    | GJ170952             | GJ170952             | -           |
| <i>Necossospora bataticola</i> | oxysporum           | NRRL 46703                                                       | -                                                | FMR 8281                                                              | Nematode egg                                                          | Spain             | -                                        | EJ329661    | EJ329661             | EJ329661             | -           |
| <i>Necossospora bataticola</i> | oxysporum           | NRRL 54703                                                       | -                                                | -                                                                     | <i>Musa acuminata</i> cv. Cavendish                                   | Guatemala         | -                                        | RS53824     | RS53824              | RS53824              | -           |
| <i>Necossospora bataticola</i> | oxysporum           | CBS 410.62                                                       | ex-type                                          | CECT 2864 = NRRL 22658                                                | <i>Cucurbita ficifolia</i>                                            | Netherlands       | -                                        | RS53825     | RS53825              | RS53825              | -           |
| <i>Necossospora bataticola</i> | oxysporum           | CBS 616.66                                                       | ex-type                                          | BBA 64411 = NRRL 22399                                                | <i>Cucurbita ficifolia</i>                                            | Netherlands       | -                                        | MW834217    | MW834217             | MW834217             | -           |
| <i>Necossospora bataticola</i> | oxysporum           | CBS 144395                                                       | -                                                | ATCC 18690 = MAF 238540 = NRRL 22163                                  | <i>Xanthoxylum piperitum</i> , branch                                 | Japan             | -                                        | EJ329496    | EJ329496             | EJ329496             | -           |
| <i>Necossospora bataticola</i> | oxysporum           | CBS 144396                                                       | ex-epitype                                       | ATCC 42366 = MAF 238541 = NRRL 22277                                  | <i>Xanthoxylum piperitum</i> , trunk                                  | Japan             | -                                        | FJ240380    | FJ240380             | FJ240380             | -           |
| <i>Necossospora bataticola</i> | oxysporum           | CBS 121450                                                       | ex-type                                          | IMI 266681                                                            | Declined grape vine                                                   | Syria             | -                                        | MW218113    | MW218113             | MW218113             | -           |
| <i>Necossospora bataticola</i> | oxysporum           | CBS 475.67                                                       | ex-type                                          | NRRL 22657                                                            | Human mycetozoa                                                       | Puerto Rico       | -                                        | MW218114    | MW218114             | MW218114             | -           |
| <i>Necossospora bataticola</i> | oxysporum           | HMAS 254518                                                      | ex-type                                          | -                                                                     | Twigs of unknown host                                                 | China             | -                                        | LS53831     | LS53831              | LS53831              | -           |
| <i>Necossospora bataticola</i> | oxysporum           | CBS 353.87                                                       | ex-type                                          | -                                                                     | <i>Capsicum annuum</i>                                                | Netherlands       | -                                        | MW218119    | MW218119             | MW218119             | -           |
| <i>Necossospora bataticola</i> | oxysporum           | CBS 833.97                                                       | ex-type                                          | NRRL 18301                                                            | <i>Rosa</i> sp., dead parts                                           | Netherlands       | -                                        | MW218120    | MW218120             | MW218120             | -           |
| <i>Necossospora bataticola</i> | oxysporum           | CBS 144389                                                       | ex-type of <i>Cephalosporium keratoplasticum</i> | MUCL 18301                                                            | Greenhouse humic soil                                                 | Belgium           | -                                        | RS53836     | RS53836              | RS53836              | -           |
| <i>Necossospora bataticola</i> | oxysporum           | CBS 490.63                                                       | ex-type of <i>Cephalosporium keratoplasticum</i> | -                                                                     | Human                                                                 | Japan             | -                                        | MW218121    | MW218121             | MW218121             | -           |
| <i>Necossospora bataticola</i> | oxysporum           | CBS 509.63                                                       | ex-type of <i>Hyalofora ramosa</i>               | IMUR 410 = MUCL 8050                                                  | Air                                                                   | Brazil            | -                                        | MW834229    | MW834229             | MW834229             | -           |
| <i>Necossospora bataticola</i> | oxysporum           | CBS 623.92                                                       | ex-epitype                                       | -                                                                     | Human necrotic wound                                                  | Germany           | -                                        | RS53845     | RS53845              | RS53845              | -           |

**Table S1 (Continued)**

| Species                          | Species complex | Culture accession number used in phylogenetic trees <sup>1</sup> | Status of culture               | Accession number in other culture or working collections <sup>1</sup> | Substrate of origin                           | Country of origin | <i>cmdA</i> | <i>rbp1</i> | <i>rbp2</i> (part 1) | <i>rbp2</i> (part 2) | <i>tef1</i> | <i>ubp2</i> |
|----------------------------------|-----------------|------------------------------------------------------------------|---------------------------------|-----------------------------------------------------------------------|-----------------------------------------------|-------------------|-------------|-------------|----------------------|----------------------|-------------|-------------|
| <i>Necossomspora maritii</i>     | -               | CBS 115:659                                                      | ex-epitype                      | FRC S-0679 = MRC 2198                                                 | <i>Solanum tuberosum</i> var. Maritima        | Germany           | MW834146    | MW834232    | JX435256             | -                    | JX435156    | -           |
| <i>Necossomspora mekriana</i>    | -               | CBS 146:525                                                      | ex-type                         | -                                                                     | <i>Chrysanthemum</i> sp. imported from Uganda | Netherlands       | MW834147    | MW834233    | MW834025             | -                    | MW834288    | -           |
| <i>Necossomspora nonaemarii</i>  | -               | CBS 146:526                                                      | -                               | -                                                                     | <i>Chrysanthemum</i> sp. imported from Uganda | Netherlands       | MW834148    | MW834234    | MW834026             | -                    | MW834289    | -           |
| <i>Necossomspora recipifhora</i> | -               | CBS 115:658                                                      | ex-type                         | FRC S-0661                                                            | <i>Solanum tuberosum</i>                      | Israel            | MW218082    | MW218129    | LR583852             | -                    | LR583630    | -           |
| <i>Necossomspora solani</i>      | -               | CBS 125:726                                                      | ex-type                         | FRC S-1842                                                            | <i>Beta vulgaris</i>                          | China             | -           | -           | -                    | -                    | -           | -           |
|                                  | -               | CBS 101:018                                                      | ex-type                         | FRC S-1831 = GJS02-89                                                 | Dead tree                                     | Sri Lanka         | MW834248    | -           | LR583871             | -                    | JF433026    | -           |
|                                  | -               | CBS 111:722                                                      | ex-type of <i>N. rubicola</i>   | -                                                                     | Raspberry                                     | Italy             | MW834249    | -           | LR583878             | -                    | LR583651    | -           |
|                                  | -               | CBS 112:101                                                      | -                               | -                                                                     | Solan wheat field                             | Japan             | -           | -           | LR583879             | -                    | LR583652    | -           |
|                                  | -               | CBS 117:149                                                      | -                               | -                                                                     | Human vocal prosthesis                        | Belgium           | -           | -           | LR583880             | -                    | LR583653    | -           |
|                                  | -               | CBS 119:996                                                      | -                               | -                                                                     | Mixture of cheese and soil                    | Austria           | -           | -           | LR583881             | -                    | LR583654    | -           |
|                                  | -               | CBS 124:893                                                      | -                               | -                                                                     | <i>Daucus carota</i>                          | Netherlands       | JX435252    | -           | JX435152             | -                    | JX435141    | -           |
|                                  | -               | CBS 140:079                                                      | ex-epitype                      | FRC S-2364 = GJS09-1466 = NRRL 66304                                  | Human nail                                    | France            | MW218088    | MW218134    | JX435241             | -                    | KT313611    | -           |
|                                  | -               | CBS 144:393                                                      | -                               | MUCL 34689                                                            | <i>Solanum tuberosum</i>                      | Slovenia          | -           | -           | KT313623             | KT313623             | LR583655    | -           |
|                                  | -               | CBS 165:87                                                       | -                               | -                                                                     | Timber on tropical greenhouse                 | Belgium           | -           | -           | LR583882             | -                    | LR583656    | -           |
|                                  | -               | NRRL 22779                                                       | -                               | -                                                                     | <i>Solanum tuberosum</i>                      | Denmark           | -           | -           | JX435257             | -                    | JX435157    | -           |
|                                  | -               | NRRL 28679                                                       | -                               | IMI130740                                                             | <i>Solanum tuberosum</i>                      | USA               | -           | -           | JX435265             | -                    | JX435165    | -           |
|                                  | -               | NRRL 32484                                                       | -                               | FRC S-1242                                                            | Human penis U Wash                            | New Zealand       | -           | -           | BJ29526              | -                    | DQ246848    | -           |
|                                  | -               | NRRL 32791                                                       | -                               | FRC S-1142                                                            | Human toenail                                 | USA               | -           | -           | BJ29556              | -                    | DQ246912    | -           |
|                                  | -               | NRRL 32810                                                       | -                               | FRC S-1198                                                            | Human                                         | USA               | -           | -           | BJ29583              | -                    | DQ246982    | -           |
|                                  | -               | NRRL 43474                                                       | -                               | -                                                                     | Human corneal ulcer                           | USA               | -           | -           | BJ29620              | -                    | DQ247100    | -           |
|                                  | -               | NRRL 46598                                                       | -                               | -                                                                     | Human eye                                     | USA               | -           | -           | BF469984             | -                    | EF452945    | -           |
|                                  | -               | NRRL 53511                                                       | -                               | CDC 2008732300                                                        | Human toenail                                 | Italy             | -           | -           | GU170593             | -                    | GU170628    | -           |
| <i>Necossomspora stercora</i>    | -               | CBS 142:480                                                      | ex-type of <i>F. witzerae</i>   | -                                                                     | <i>Hibiscus</i> sp. branch                    | Germany           | -           | -           | LR583886             | -                    | KY565625    | -           |
|                                  | -               | CBS 142:481                                                      | ex-type                         | DSM 106211                                                            | Compost yard debris                           | Germany           | MW834173    | MW834255    | LR583887             | -                    | LR583658    | -           |
|                                  | -               | CBS 187:35                                                       | -                               | MUCL 18259                                                            | Greenhouse humic soil                         | Belgium           | MW834174    | MW834256    | LR583888             | -                    | LR583659    | -           |
|                                  | -               | CBS 260:54                                                       | -                               | BBA 2318                                                              | -                                             | -                 | -           | -           | LR583883             | -                    | LR583657    | -           |
|                                  | -               | CGMCC 3.19676                                                    | -                               | DBN11-1                                                               | Waterlogged soil                              | China             | -           | MH992281    | -                    | -                    | MH992629    | -           |
|                                  | -               | FRCS-2570                                                        | -                               | FRC S-2570 = GJS09-1458                                               | <i>Solanum tuberosum</i>                      | Slovenia          | -           | -           | KT313605             | -                    | KT313617    | -           |
|                                  | -               | GJ5 09-1459                                                      | -                               | -                                                                     | <i>Solanum tuberosum</i>                      | Slovenia          | -           | -           | KT313617             | -                    | KT313617    | -           |
|                                  | -               | CBS 143:214                                                      | ex-type                         | NRRL 32858                                                            | Human wound                                   | USA               | MW218092    | MW218138    | BJ29630              | -                    | DQ247163    | -           |
|                                  | -               | CBS 115:40                                                       | -                               | NRRL 54972                                                            | Equine eye                                    | USA               | MW218093    | MW218139    | KC808336             | -                    | KC808197    | -           |
|                                  | -               | CBS 118:931                                                      | -                               | -                                                                     | <i>Musa sapientum</i>                         | Vietnam           | MW218094    | MW218140    | LR960564             | -                    | LR960672    | -           |
|                                  | -               | CBS 143:208                                                      | -                               | -                                                                     | <i>Solanum lycopersicum</i>                   | UK                | MW218095    | MW218141    | LR583891             | -                    | LR583662    | -           |
|                                  | -               | CBS 143:217                                                      | -                               | FRC S-0452 = NRRL 32755                                               | Turtle head lesion                            | USA               | -           | -           | BJ29613              | -                    | DQ247073    | -           |
|                                  | -               | CBS 222:49                                                       | -                               | NRRL 43811                                                            | Human cornea                                  | USA               | -           | -           | EF470092             | -                    | EF453053    | -           |
|                                  | -               | NRRL 46615                                                       | -                               | -                                                                     | <i>Euphorbia julgens</i>                      | Netherlands       | -           | -           | LR583890             | -                    | LR583661    | -           |
|                                  | -               | NRRL 46676                                                       | -                               | -                                                                     | Soil                                          | Italy             | -           | -           | -                    | -                    | GU250543    | -           |
|                                  | -               | CBS 446:93                                                       | ex-type of <i>N. boninensis</i> | IMI316967 = NHL2919                                                   | Soil                                          | Japan             | MW834175    | MW834257    | LR583898             | -                    | LR583670    | -           |
|                                  | -               | CBS 533:65                                                       | -                               | IMI302625                                                             | Soil                                          | India             | MW834176    | MW834258    | LR583899             | -                    | LR583671    | -           |

<sup>1</sup> ARSEF: Collection of entomopathogenic fungi cultures, US Department of Agriculture (USDA), Agricultural Research Service (ARS), Ithaca, NY, USA; ATCC: American Type Culture Collection, Manassas, VA, USA; BBA: Biologische Bundesanstalt für Land- und Forstwirtschaft, Institut für Mikrobiologie Berlin, Germany; CBS: Westerdijk Fungal Biodiversity Institute (WI), Utrecht, The Netherlands; CDC: Centers for Disease Control and Prevention, Atlanta, GA, USA; CECT: Spanish Type Culture Collection, Universidad de Valencia, Burjassot, Spain; CGMCC: China General Microbiological Culture Collection Center, Institute of Microbiology, Chinese Academy of Science, Beijing, China; CML: Coleção Mikológica de Lavras, Universidade Federal de Lavras, Minas Gerais, Brazil; CMM: Culture Collection of Phytopathogenic Fungi "Prof. Maria Meneses", Universidade Federal do Rio de Janeiro, Rio de Janeiro, Brazil; CPC: Canadian National Mycological Herbarium and Culture Collection, AAFC, Ottawa, Ontario, Canada; DSM: DSMZ-Deutsche Sammlung von Mikroorganismen und Zellkulturen GmbH, Braunschweig, Germany; FMR: Facultad de Medicina y Ciencias de la Salud, Reus, Spain; FRC: Fusarium Research Center, Pennsylvania State University, PA, USA; GJS: Collection of G.J. Samuels, USDA-ARS, USA; HMAS: Herbarium Mycologicum Academiae Sinicae, Chinese Academy of Science, Beijing, China; ICMP: International Collection of Microorganisms from Plants, Plant Diseases Division, DSIR, Auckland, New Zealand; IHEM: Biomedical Fungi and Yeasts Collection, Scientific Institute of Public Health, Belgium; IMI: CAB International, UK; IMUR: Institute of Mycology, University of Recife, Recife, Brazil; InaCC: Indonesian Culture Collection, Research Center for Biology, Indonesian Institute of Science (LIPI), Cibinong, Indonesia; IPD: Culture collection of the Research Institute for Plant Protection, Wageningen, The Netherlands; KSU: Department of Plant Pathology, Kansas State University, Manhattan, Kansas; KUMCC: Kummung Institute of Botany, Kummung, China; LC: Working collection of Lai Cai, State Key Laboratory of Mycology, Institute of Microbiology, Chinese Academy of Science, Beijing, P.R. China; MAFF: Ministry of Agriculture, Forestry and Fisheries, Tsukuba, Ibaraki, Japan; MFLUCC: Mae Fah Luang University Herbarium, Chiang Rai, Thailand; MRC: Microbial Culture Collection, South African Medical Research Council, Division of Plant Pathology, University of Pretoria, Pretoria, South Africa; RBG: Royal Botanic Gardens Trust, Sydney, New South Wales, Australia; UBCCC: Culture Collection of University of Western Brittany, LUBEM Plouzané, France; UHSC: Fungus Testing Laboratory, Department of Pathology, University of Texas Health Science Center, San Antonio, USA; Tokyo, Japan; NRRL: Agricultural Research Service Culture Collection, National Center for Agricultural Utilization Research, USDA, Peoria, IL, USA; PD: Plant Protection Service, NWA, Division Plant, Wageningen, The Netherlands; PRPBH: South African National Collection of Fungi (NCF), Mycology Unit, Biosystematics Division, Plant Protection Institute, Agricultural Research Council, Roooplaat, Pretoria, South Africa; RBG: Royal Botanic Gardens Trust, Sydney, New South Wales, Australia; UBCCC: Culture Collection of University of Western Brittany, LUBEM Plouzané, France; UHSC: Fungus Testing Laboratory, Department of Pathology, University of Texas Health Science Center, San Antonio, USA.

<sup>2</sup> *cmdA*: partial calmodulin gene; *rbp1*: partial DNA-directed RNA polymerase II largest subunit gene; *rbp2*: partial DNA-directed RNA polymerase II second largest subunit gene; *tef1*: partial translation elongation factor 1-alpha gene; *ubp2*: partial beta-tubulin gene.

<sup>3</sup> \*. Sequence not available at GenBank/ENA, obtained from K. O'Donnell's alignment datasets.
